# Supplementary material
Source: MDPI journal article supplement (https://www.mdpi.com/2313-0105/9/4/234)
Supplement: s1 [file s1]

# Structural and dynamic characterization of Li–ionic liquid electrolyte solutions for application in Li-ion batteries: a Molecular Dynamics Approach

Michele A. Salvador<sup>\*\*</sup>,<sup>1</sup>, Rita Maji<sup>2</sup>, Francesco Rossella<sup>1,4</sup>, Elena Degoli<sup>3,4,5</sup>, Alice Ruini<sup>1,4,5</sup>, and Rita Magri<sup>\*</sup>,<sup>1,4,5</sup>

<sup>1</sup>Dipartimento di Scienze Fisiche, Informatiche e Matematiche, Università di Modena e Reggio Emilia, Via Campi 213/A, 41125 Modena, Italy

<sup>2</sup>Dipartimento di Scienze e Metodi dell'Ingegneria, Università di Modena e Reggio Emilia, Via Amendola 2 Padiglione Tamburini, I-42122 Reggio Emilia, Italy

<sup>3</sup>Dipartimento di Scienze e Metodi dell'Ingegneria, Università di Modena e Reggio Emilia and Centro Interdipartimentale En&Tech, Via Amendola 2 Padiglione Morselli, I-42122 Reggio Emilia, Italy

<sup>4</sup>Centro S3, Istituto Nanoscienze-Consiglio Nazionale delle Ricerche (CNR-NANO), Via Campi 213/A, 41125 Modena, Italy

<sup>5</sup>Centro Interdipartimentale di Ricerca e per i Servizi nel settore della produzione, stoccaggio ed utilizzo dell'Idrogeno H2-MO.RE., Via Università 4, 41121 Modena, Italy

<sup>\*</sup>corresponding author 1: Rita Magri (rita.magri@unimore.it)

<sup>\*\*</sup>corresponding author 2: Michele A. Salvador (michelesalvador@gmail.com)

## Supplementary Material

Table S1: Identification of all species considered in this paper. \*code: identification of the species throughout the paper.

| code* | name                                     | composition       | image                                                                                 |
|-------|------------------------------------------|-------------------|---------------------------------------------------------------------------------------|
| Pyr12 | <i>1-methyl-1-ethyl pyrrolidinium</i>    | $C_7H_{16}N^+$    | 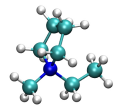   |
| Pyr13 | <i>1-methyl-1-propyl pyrrolidinium</i>   | $C_8H_{18}N^+$    |    |
| Pyr14 | <i>1-methyl-1-butyl pyrrolidinium</i>    | $C_{10}H_{20}N^+$ |  |
| Pyr15 | <i>1-methyl-1-pentyl pyrrolidinium</i>   | $C_{11}H_{22}N^+$ |  |
| Pyr16 | <i>1-methyl-1-hexyl pyrrolidinium</i>    | $C_{12}H_{24}N^+$ |  |
| BF4   | <i>tetrafluoroborate</i>                 | $BF_4^-$          |  |
| PF6   | <i>hexafluorophosphate</i>               | $PF_6^-$          |  |
| TFSI  | <i>bis(trifluoro-methane)sulfonimide</i> | $(CF_3SO_2)_2N^-$ |  |

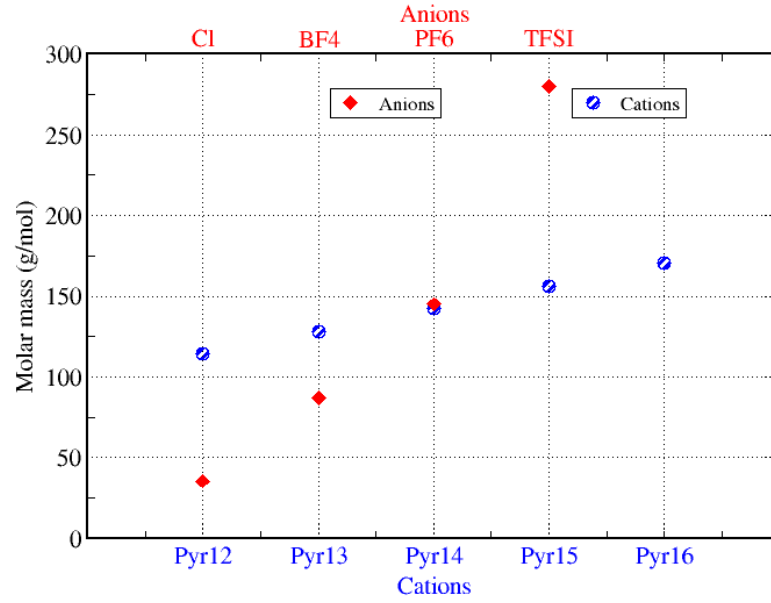

Figure S1: Calculated molar mass of cations and anions.

Table S2: Energy values obtained from DFT calculations of each species.  $\Delta E$ : single point energy;  $E_{zp}$ : zero-point energy;  $\Delta G$ : Gibbs free energy;  $\Delta H$ : enthalpy. Unit: a.u.: Hartree.

| Species | $\Delta E$ (a.u.) | $E_{zp}$ (a.u.) | $\Delta G$ (a.u.) | $\Delta H$ (a.u.) |
|---------|-------------------|-----------------|-------------------|-------------------|
| Pyr12   | -330.818          | 0.231           | -330.619          | -330.577          |
| Pyr13   | -370.123          | 0.260           | -369.897          | -369.852          |
| Pyr14   | -409.427          | 0.289           | -409.176          | -409.126          |
| Pyr15   | -448.732          | 0.317           | -448.453          | -448.401          |
| Pyr16   | -488.036          | 0.346           | -487.730          | -487.675          |
| BF4     | -424.434          | 0.014           | -424.447          | -424.414          |
| PF6     | -940.413          | 0.017           | -940.427          | -940.388          |
| TFSI    | -1826.590         | 0.043           | -1826.589         | -1826.529         |

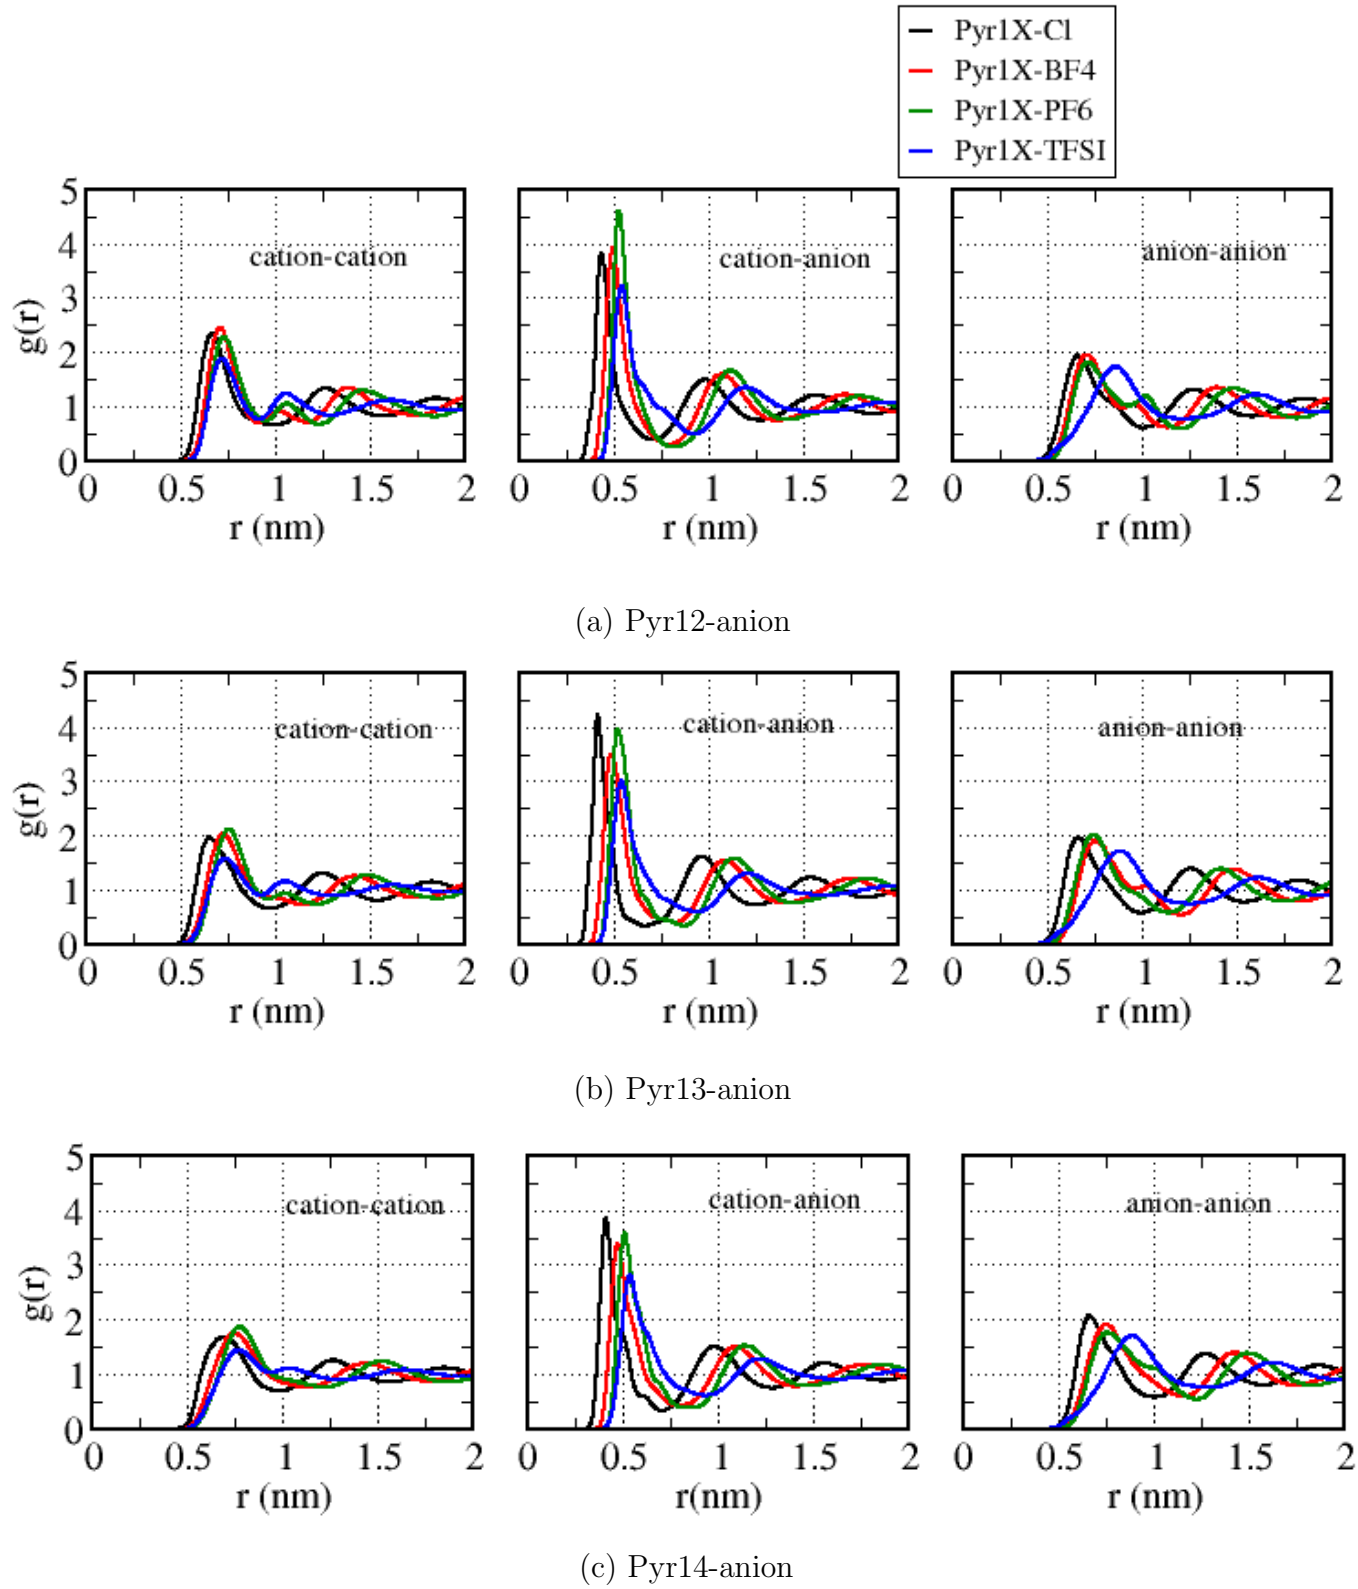

Figure S2: Center-of-mass cation-cation, cation-anion and anion-anion pair correlation functions ( $g(r)$ ) for all the cation-anion combinations with: (a) Pyr12 as cation, (b) Pyr13, (c) Pyr14

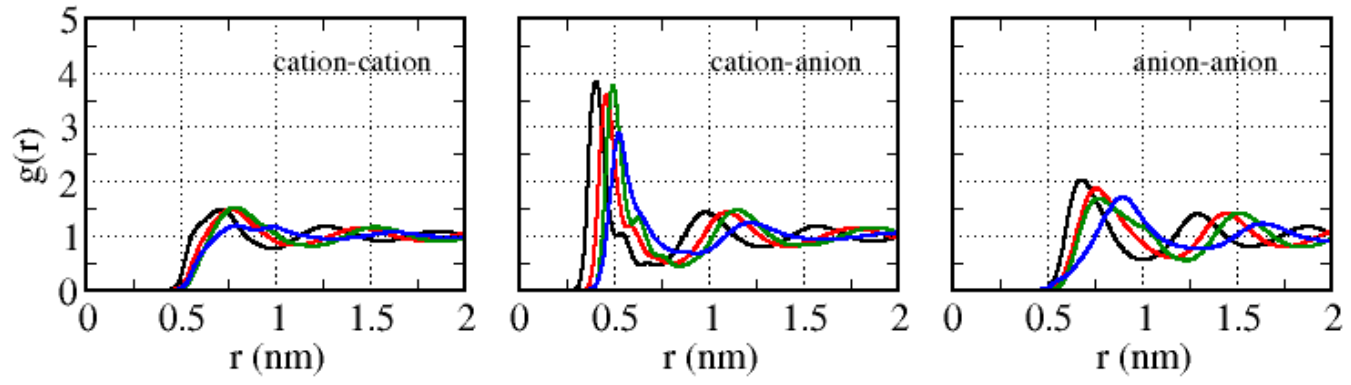

(a) Pyr15-anion

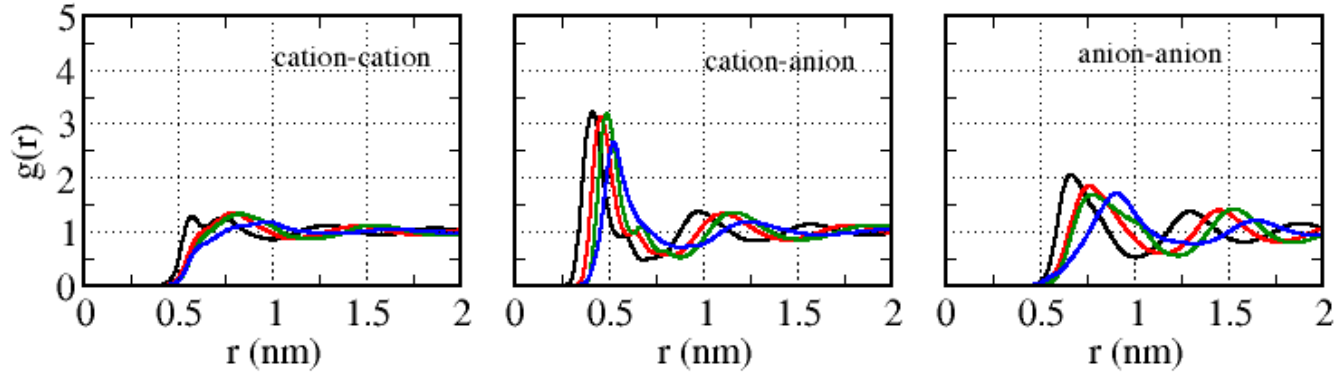

(b) Pyr16-anion

Figure S3: Center-of-mass cation-cation, cation-anion and anion-anion pair correlation functions ( $g(r)$ ) for all the cation-anion combinations with: (a) Pyr15 as cation, (b) Pyr16 as a cation.

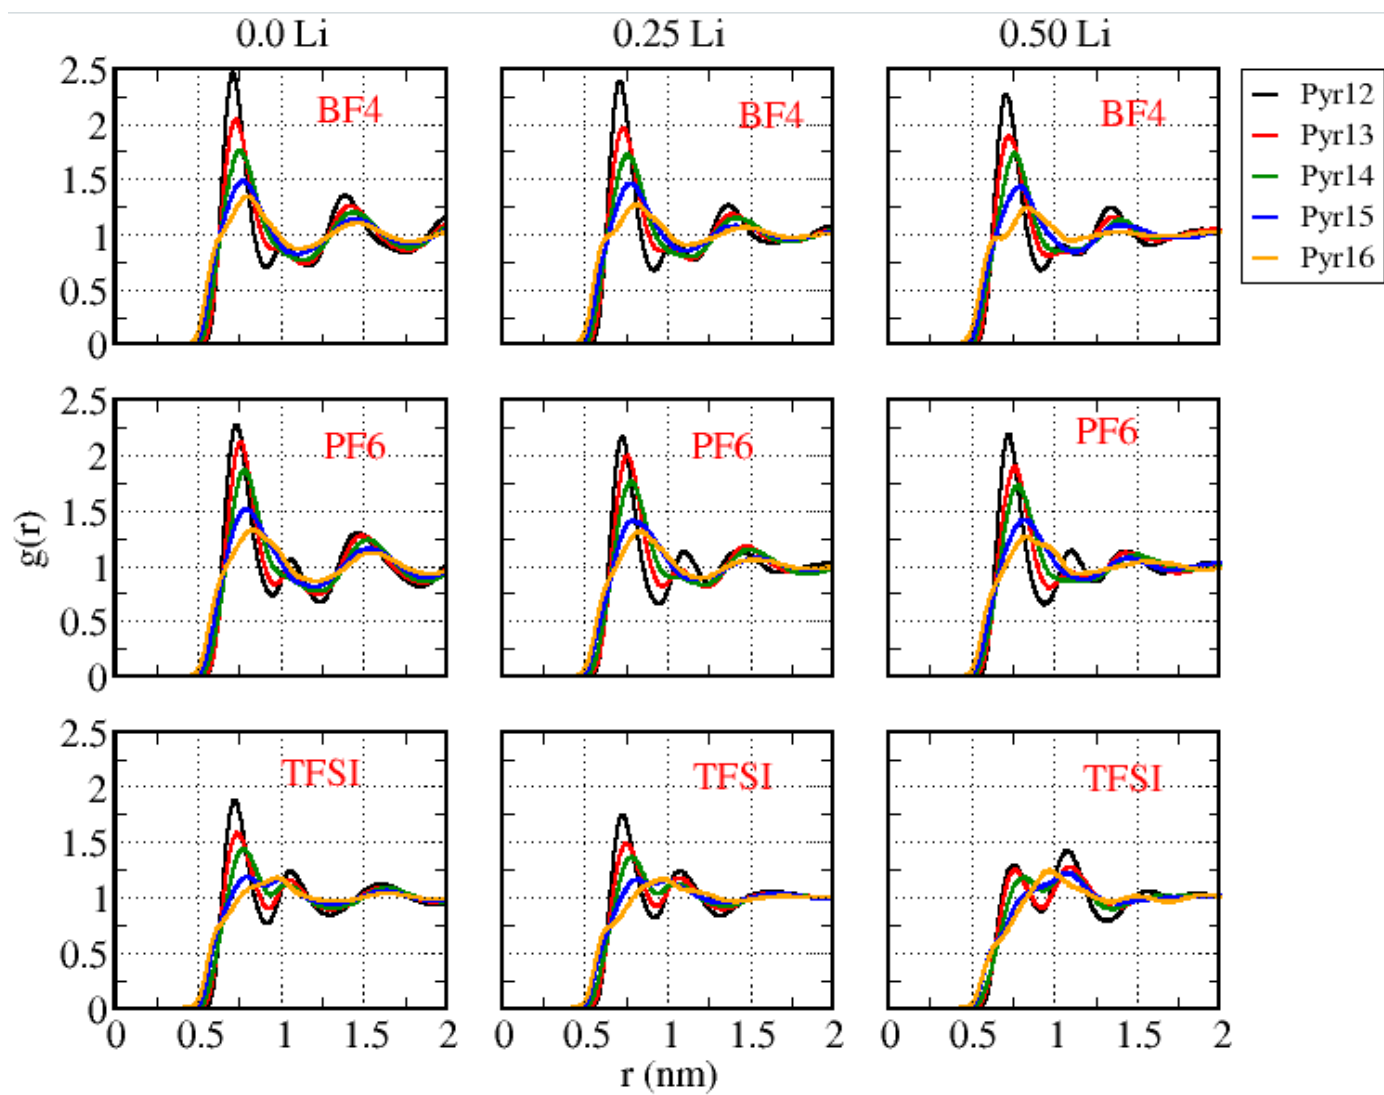

Figure S4: Center-of-mass cation-cation  $g(r)$  with all fractions of Li.

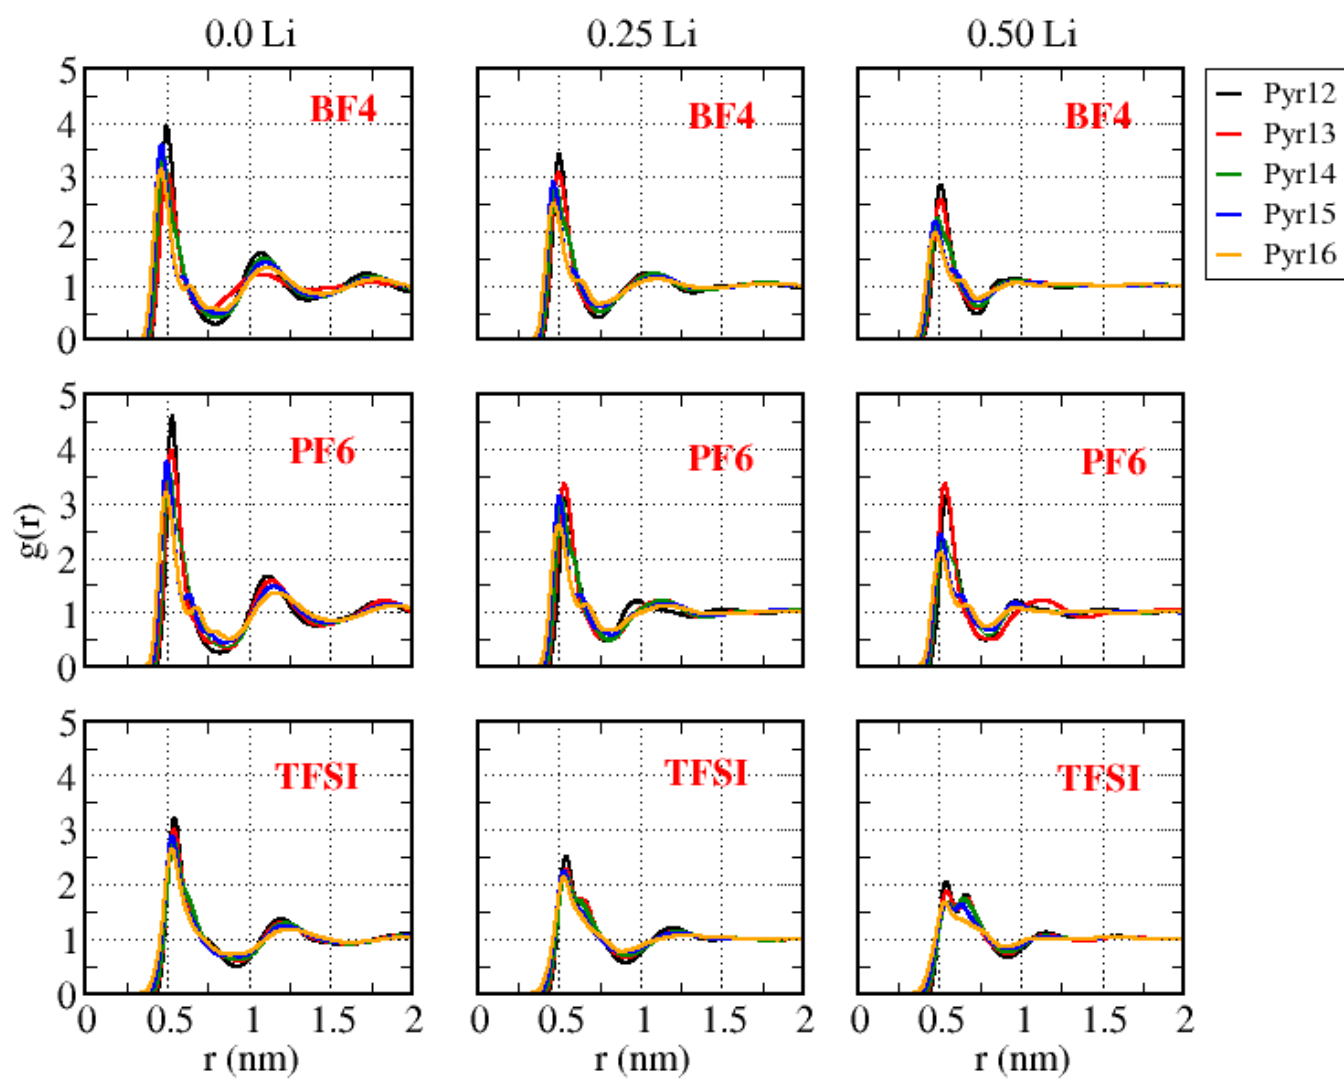

Figure S5: Center-of-mass cation-anion  $g(r)$  with all fractions of Li.

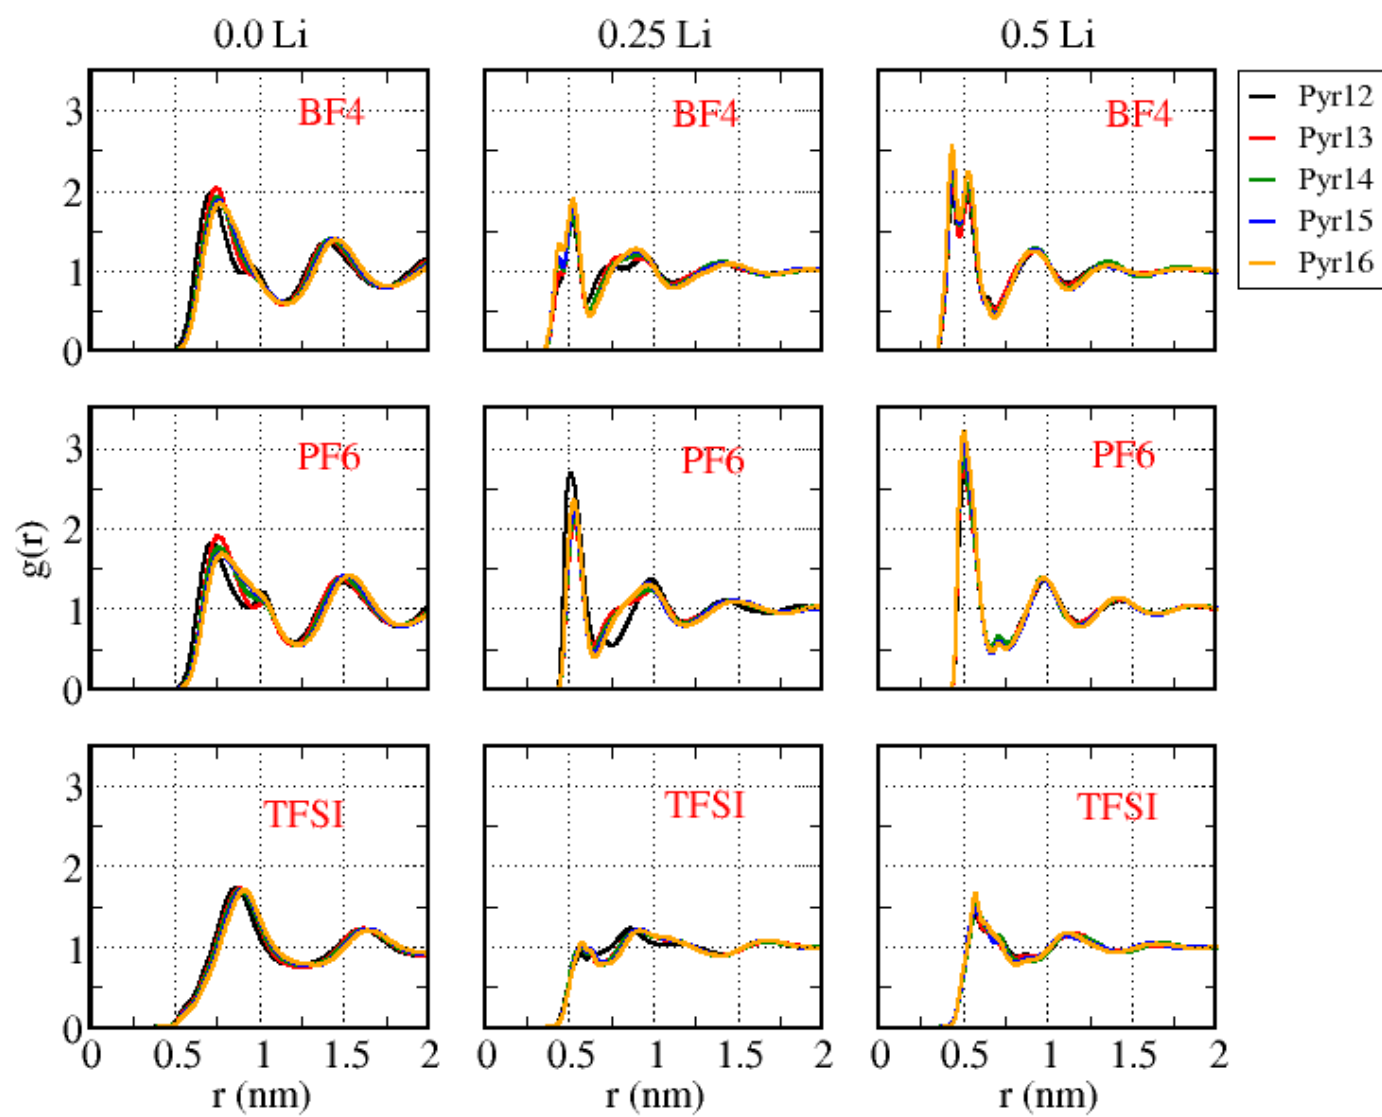

Figure S6: Center-of-mass anion-anion  $g(r)$  with all fractions of Li.



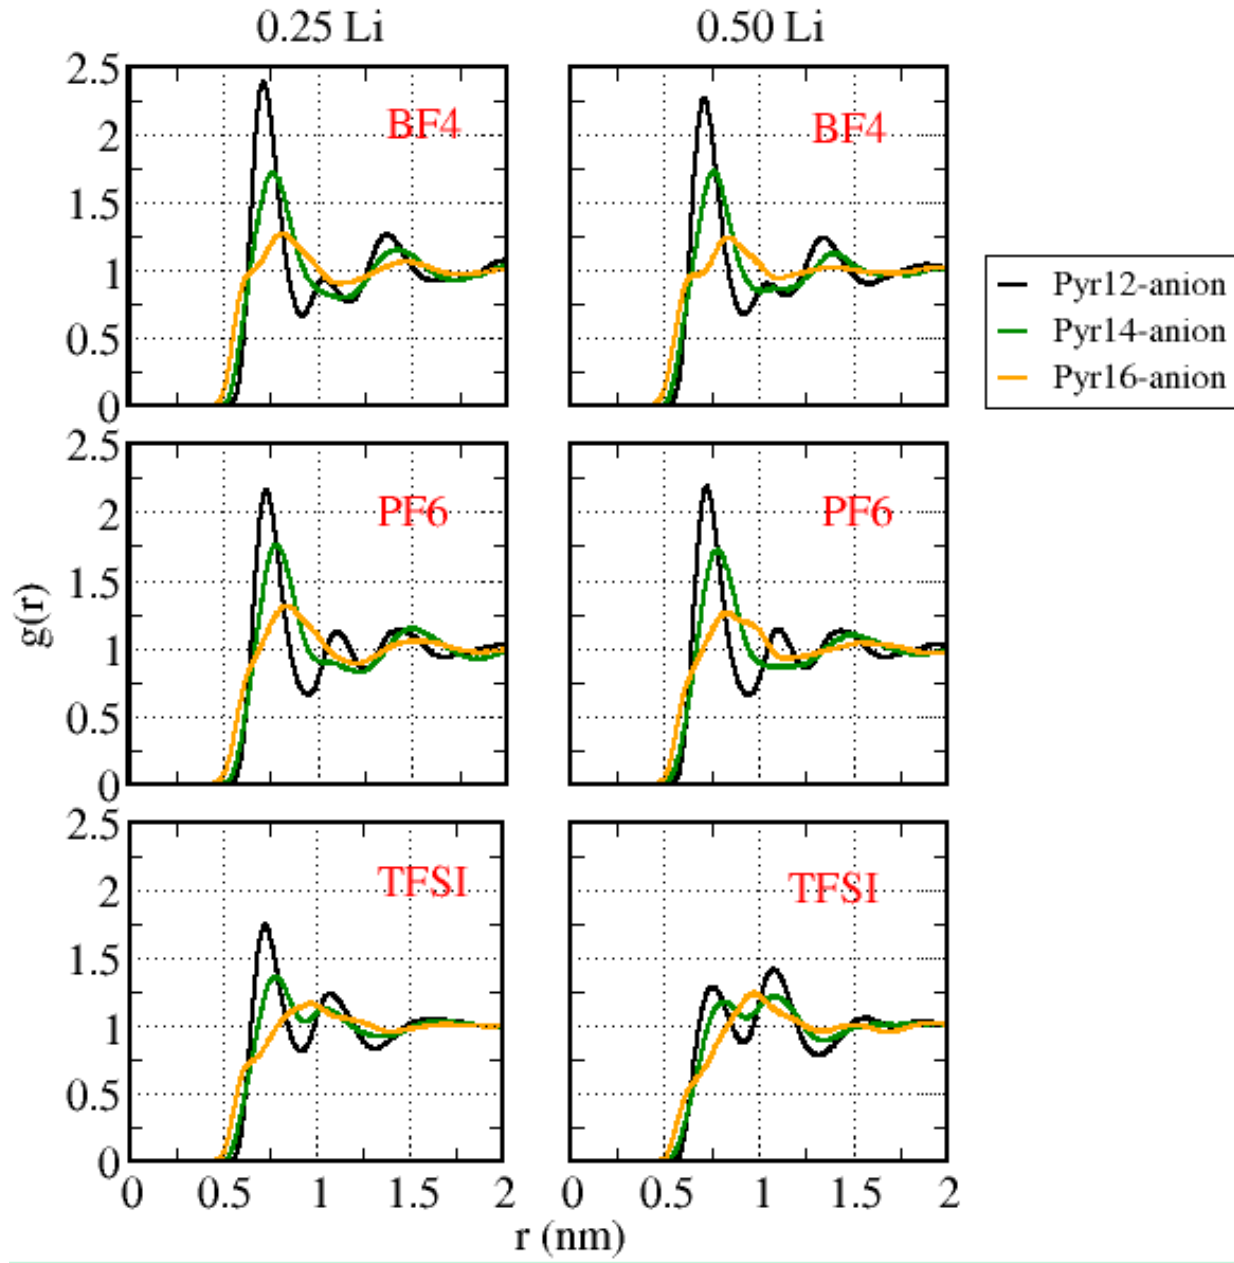

Figure S7: Center-of-mass cation-cation  $g(r)$  for systems Pyr12-anion, Pyr14-anion and Pyr16-anions.
